# Supplementary material for: A highly selective and sensitive acylhydrazone-based turn-on optical sensor for Al3+
Source: Royal Society of Chemistry journal article supplement (doi:10.1039/c6ra01589a), 2016-01-01
Supplement: c6ra01589a1.pdf [file c6ra01589a1.pdf]

## Support Information

<sup>a</sup> Oil & Gas Field Applied Chemistry Key Laboratory of Sichuan Province, College of Chemistry and Chemical Engineering, Southwest Petroleum University, 8 Xindu Road, Xindu, Chengdu, 610500, China

<sup>b</sup> Key Laboratory of Oil & Gas Fine Chemicals, Ministry of Education, College of Chemistry and Chemical Engineering, Xinjiang University, Urumqi 830046, Xinjiang, China

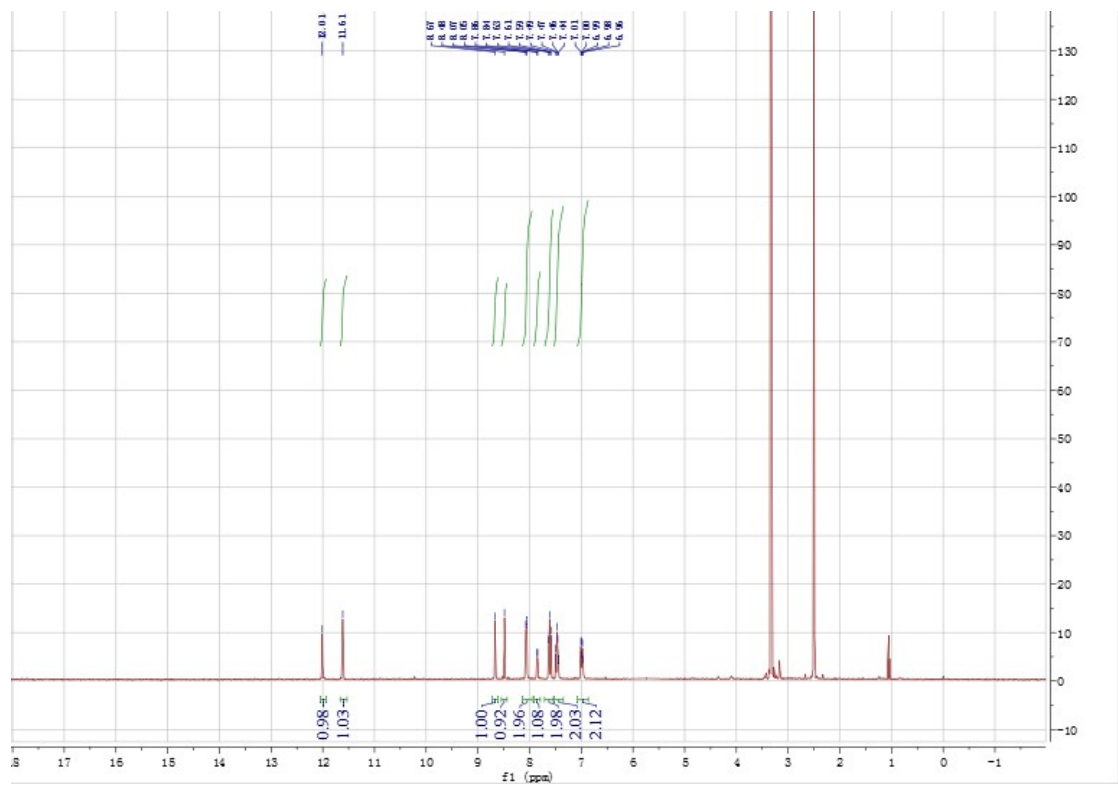

Figure S1  $^1\text{H}$  NMR chart of M1 ( $\text{DMSO-d}_6$ )

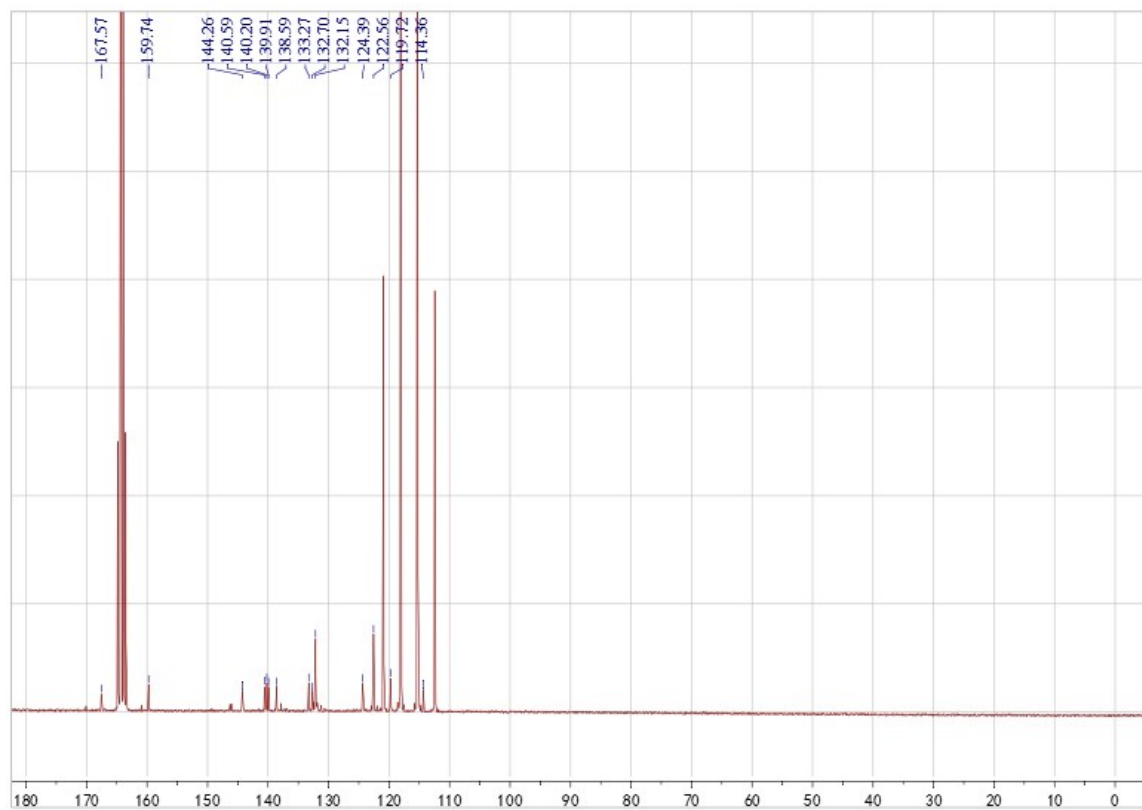

Figure S2 <sup>13</sup>C NMR chart of M1 (CF<sub>3</sub>COOD)

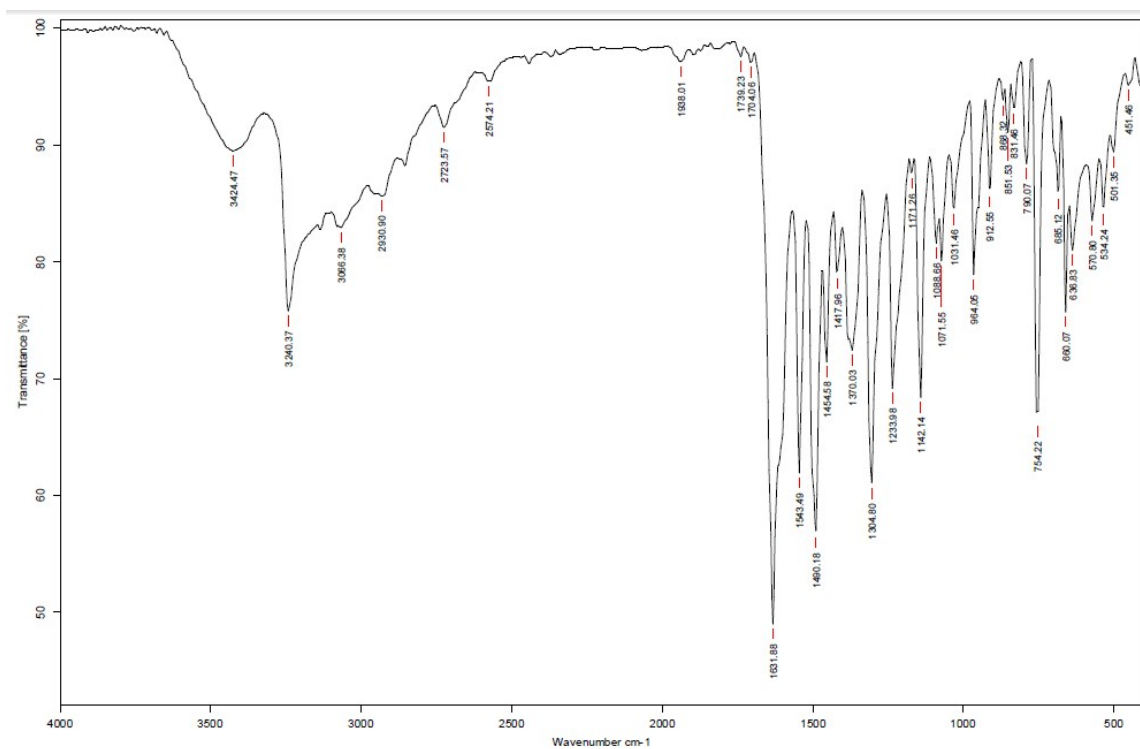

Figure S3 The IR spectra of M1

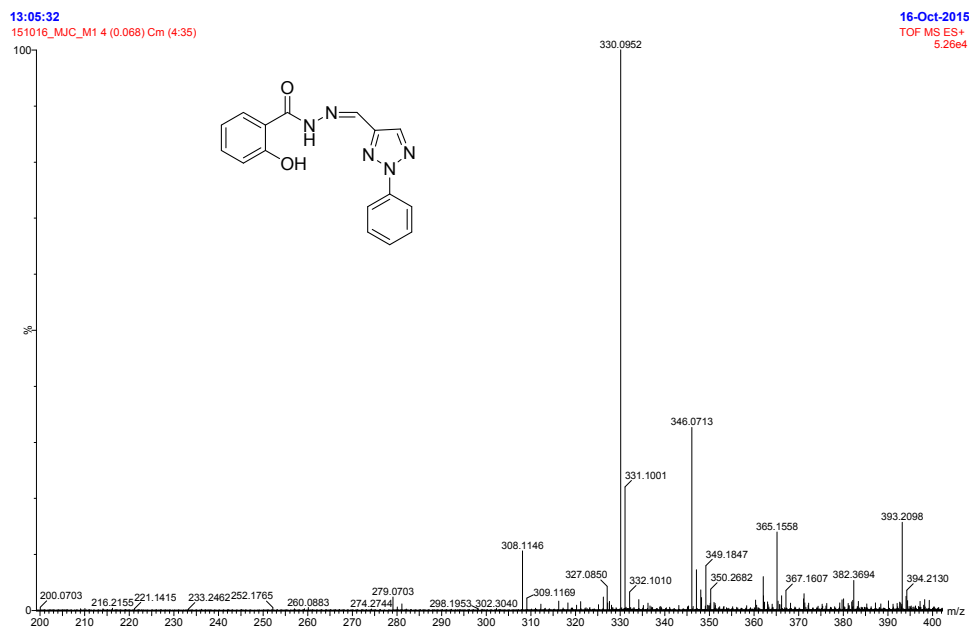

Figure S4 HR-MS Spectra of M1, M=307

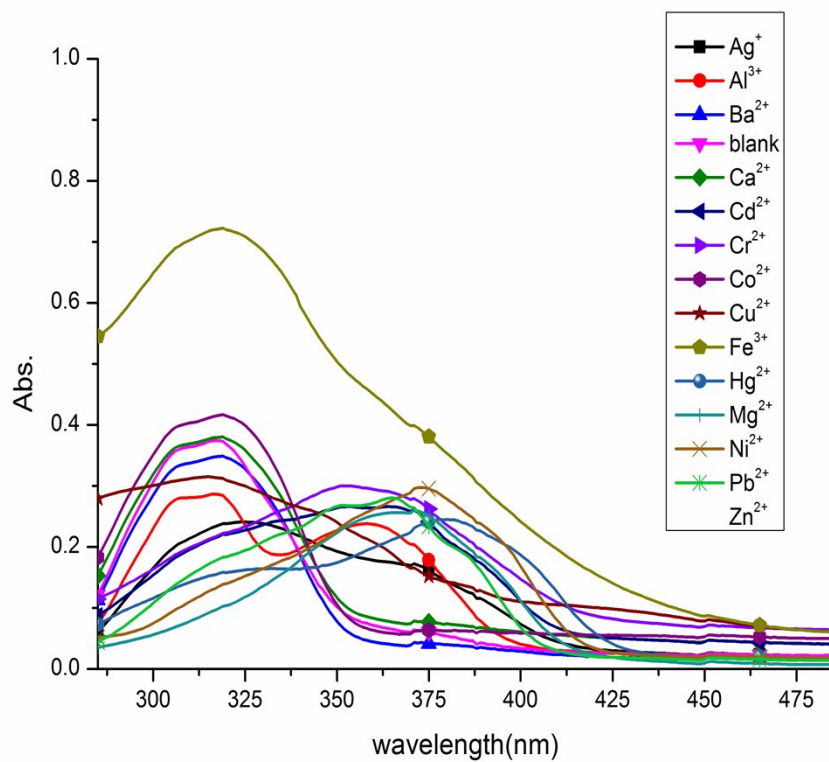

Figure S5 UV-vis spectral changes of M1 upon addition of Al<sup>3+</sup> and other metal ions in ethanol at room temperature ( $[M1] = 10.0 \mu\text{M}$ ,  $[M^{n+}] = 10.0 \text{equiv.}$ ).

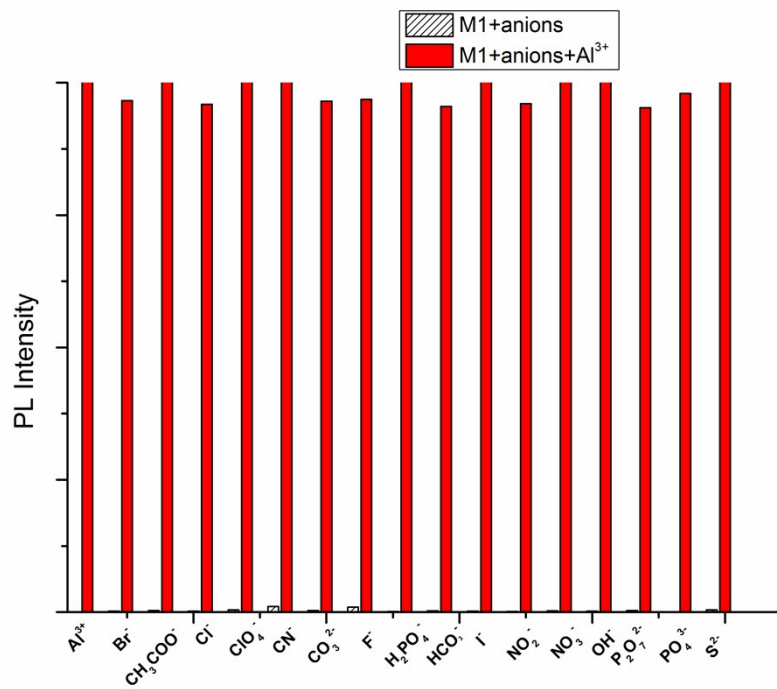

Figure S6. Interference from anions in a binary mixture: M1 (10.0  $\mu$ M) + Al<sup>3+</sup> (10.0 equiv.) + A<sup>n-</sup> (10.0 equiv.), where A<sup>n-</sup>=Br<sup>-</sup>, CH<sub>3</sub>COO<sup>-</sup>, Cl<sup>-</sup>, ClO<sub>4</sub><sup>-</sup>, CN<sup>-</sup>, CO<sub>3</sub><sup>2-</sup>, F<sup>-</sup>, H<sub>2</sub>PO<sub>4</sub><sup>-</sup>, HCO<sub>3</sub><sup>-</sup>, I<sup>-</sup>, NO<sub>2</sub><sup>-</sup>, NO<sub>3</sub><sup>-</sup>, OH<sup>-</sup>, P<sub>2</sub>O<sub>7</sub><sup>2-</sup>, PO<sub>4</sub><sup>3-</sup>, S<sup>2-</sup> ( $\lambda_{\text{ex}}$ = 358 nm, ethanol).

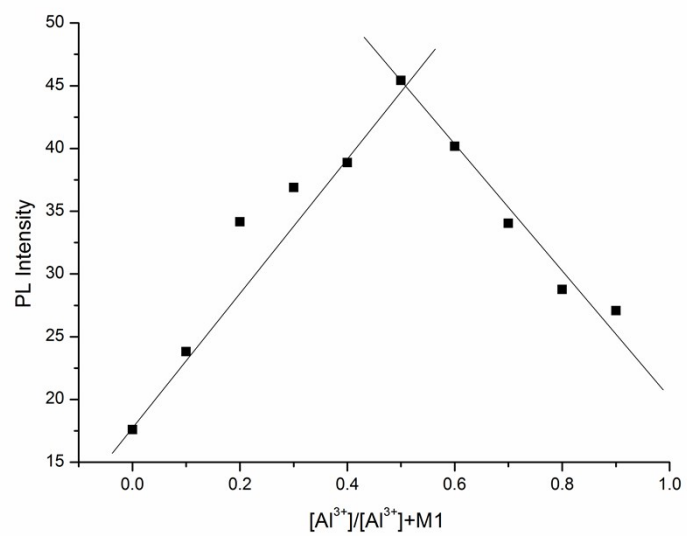

Figure S7. Job's plot of M1 and  $Al^{3+}$  in ethanol at 442nm



160304\_XNSY 43 (0.548) Cm (1:48)

Scan ES+  
5.51e6

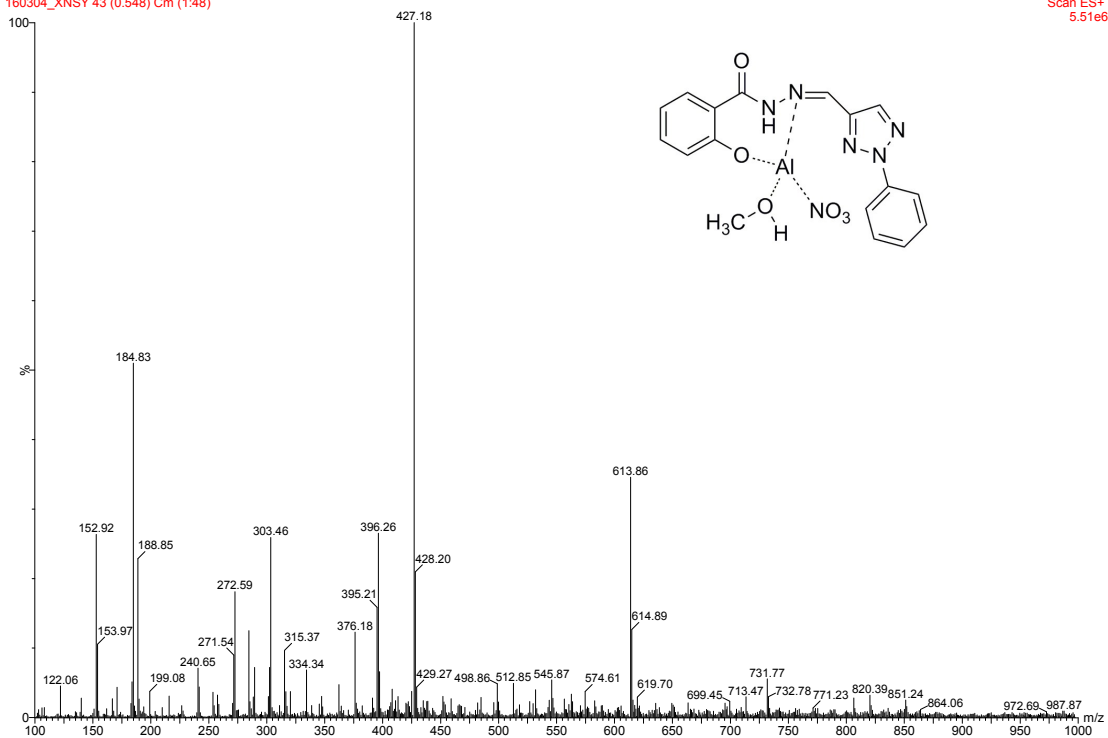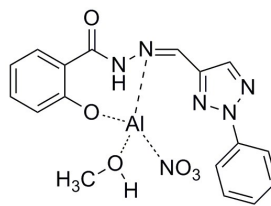

Figure S8. Mass spectrum of complex M1-Al<sup>3+</sup>, M=427
